# Supplementary material for: Investigation of Parasitic Infection in Crocodile Lizards (Shinisaurus crocodilurus) Using High-Throughput Sequencing
Source: MDPI journal article supplement (doi:10.3390/ani12202726), 2022-10-11
Supplement: s1 [file s1]

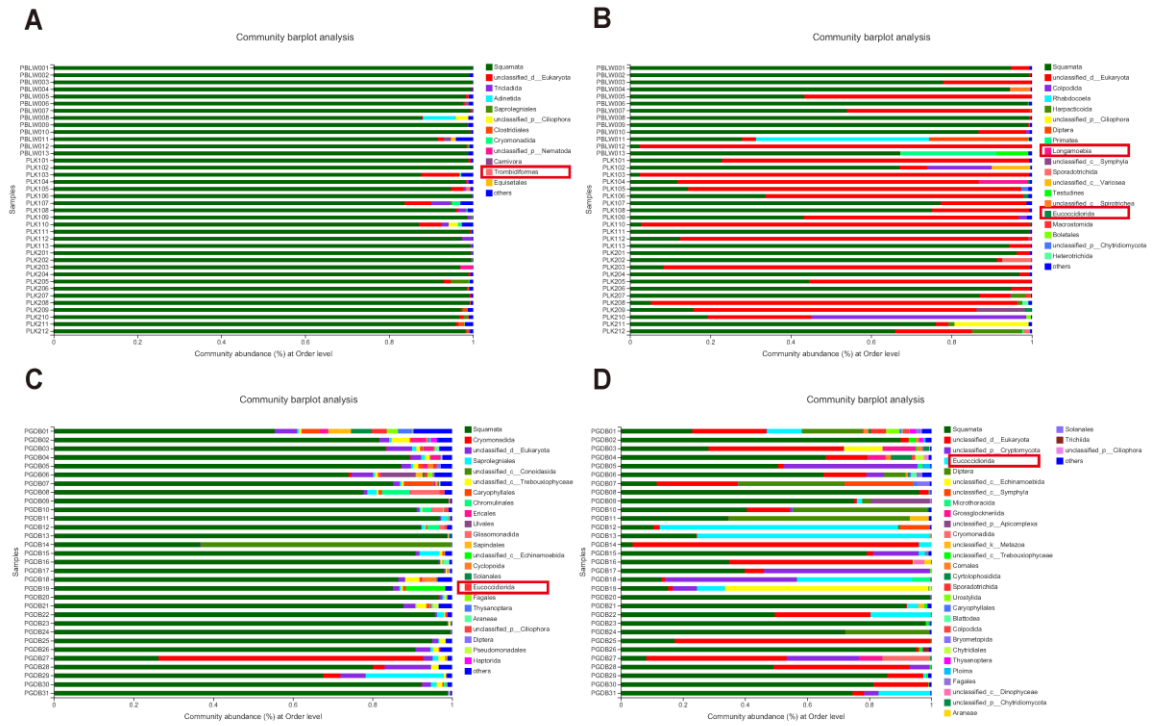

Figure S3. Composition of parasites in each sample at order level.

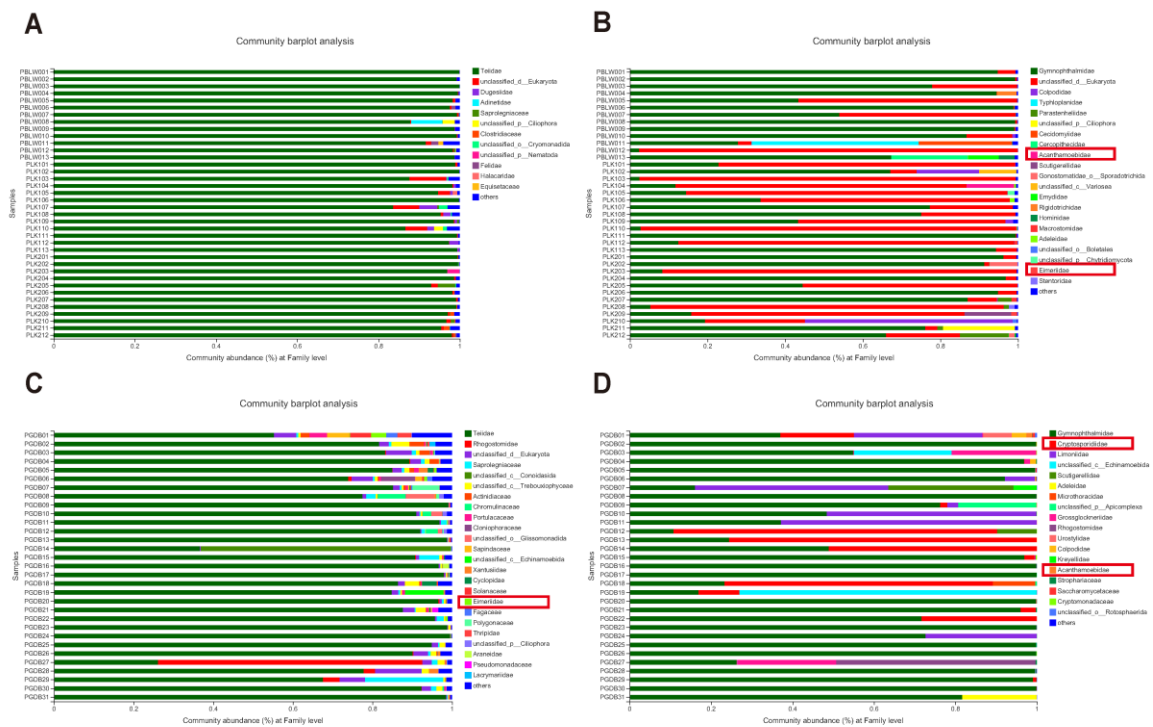

Figure S4. Composition of parasites in each sample at family level.
